# Olfactory receptors are sensitive to molecular volume of odorants

*Majid Saberi      Hamed Seyed-allaei\**

School of Cognitive Science,  
Institute for Research in Fundamental Sciences (IPM),  
Tehran, Iran

## Abstract

To study olfaction, first we should know which physical or chemical properties of odorant molecules determine the response of olfactory receptor neurons, and then we should study the effect of those properties on the combinatorial encoding in olfactory system.

In this work we show that the response of an olfactory receptor neuron in *Drosophila* depends on molecular volume of an odorant; The molecular volume determines the upper limits of the neural response, while the actual neural response may depend on other properties of the molecules. Each olfactory receptor prefers a particular volume, with some degree of flexibility. These two parameters predict the volume and flexibility of the binding-pocket of the olfactory receptors, which are the targets of structural biology studies.

At the end we argue that the molecular volume can affects the quality of perceived smell of an odorant via the combinatorial encoding, molecular volume may mask other underlying relations between properties of molecules and neural responses and we suggest a way to improve the selection of odorants in further experimental studies.

## 1 Introduction

Survival of many species depends on their olfactory system. They use it to search for food, avoid poison, escape from danger, find mate, and bind to their offspring. An olfactory system detects volatile chemicals in the

---

\*hamed@ipm.ir

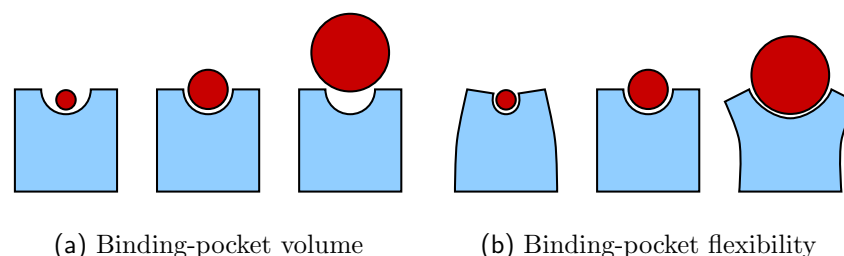

Fig. 1: This figure shows different scenarios that may happen when an odorant molecule (ligand) binds to a receptor. Fig. 1a shows the effect of binding-pocket volume. From left to right, misfit because of small volume of molecule, perfect match and misfit because of large molecular volume. Fig. 1b demonstrates that the flexibility of a receptor may compensate for the volume mismatches. The red disks (dark grey in b&w) are odorant molecule, and the blue shapes (light grey in b&w) are olfactory receptor and binding-pocket.

surrounding, encodes the results and transmit them to limbic system and cortex.

The front end of the olfactory system are olfactory receptor neurons. Each neuron expresses only one kind of olfactory receptor (in insects they are co-expressed with Orco [1]), neurons of the same type converge into the same glomeruli of the olfactory bulb (or antenatal lobe in insects), so that each glomerulus of olfactory bulb receives an amplified signal from only one type of olfactory receptor [2–10].

From neural recordings we know that the olfactory systems use a combinatorial code: an olfactory receptor can be triggered by different odorant molecules, and an odorant molecule can excite different olfactory receptors [11]. The combinatorial code helps the olfactory system to discriminates trillion odors [12]. However, it is not clear yet which properties of a molecule contribute to its smell, it is a topic of ongoing researches and there are many theories [13–24].

In this study, we investigate the relation between molecular volumes of odorants and the responses of olfactory receptor neurons. Our results suggest that molecular volume is a considerable factor, but not the only factor that determines the neural response of the olfactory receptor neurons.

The olfactory receptors are transmembrane proteins. In vertebrates, they are metabotropic receptors, they belong to the family of g-protein coupled receptor (GPCR), Linda B. Buck and Richard Axel won the Nobel

Prize in Physiology or Medicine, in 2004, for the discovery of this [25]. There are many similarities between the olfactory system of insects and vertebrates [26, 27], and it was assumed that insects use the same kind of signal transduction [28, 29], but recently, it has been argued that the olfactory receptors in insects are inotropic [30–33], their topology is different from vertebrates [34, 35], and they function in presence of another common receptor, called Orco [1].

Regardless of the signal transduction, all olfactory receptor have the same function, they have a binding-pocket (also known as binding-cavity and binding-site), where the ligands (odorants) bind to. This binding activates the receptors and the activated receptor changes the potential of the cell, directly (inotropic) or indirectly (metabotropic).

The amount of change in the membrane potential of a olfactory receptor neuron depends on the number of activated olfactory receptor proteins and the time that they remain activated, which are determined by various physiochemical properties of the ligand (odorant) and the receptor [13, 15, 19], but here we focus only on two of them: the volume and the flexibility of the binding-pocket. The molecular volume of a ligand should match the dimensions of the binding-pocket of the receptor, then it fits into the binding-pocket of the receptor and triggers the signal transduction. Any mismatch in the volumes will affect the neural responses (Fig. 1a), on the other hand the flexibility of the binding-pocket can compensate for the volume mismatch (Fig. 1b),

We could know the volume and flexibility of the binding-pocket, if we knew its three dimensional structure. But this is not the case here, it is not easy to know the structure of integral proteins [36, 37], including olfactory receptor. It is the topic of ongoing researches, using various methods like Molecular Dynamic (MD) simulations, mutagenesis studies, heterologous expression studies, and homology modeling [38–46]. In this study, we use neural recording to predict the volume and flexibility of binding-pocket of olfactory receptors, *in-vivo*.

In this study we suggest a functional relation between molecular volume and the neural responses, we provide a methodology to estimate *chemical range* or *tuning function* of olfactory receptors, and then we predict the structural properties of the binding-pocket of olfactory receptor - the volume and the flexibility of binding-pocket. Our results may help to odorant selection of new experimental studies, may provide additional information about the structure of olfactory receptors to structural biologists, and may contribute to the study of olfactory coding.

To perform this study we use a public domain, well structured database

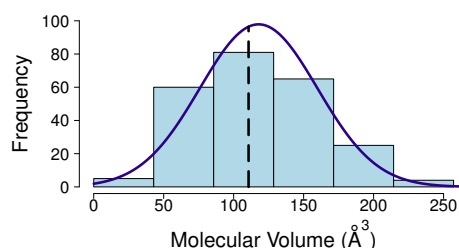

Fig. 2: Density function of molecular volumes ( $g(v)$ ), considering all molecules of DoOR database. The actual density function of molecular of volumes in each experiment ( $g(v)$ ) might be slightly different because each experiment uses a different subset of molecules. The solid line is a Gaussian fit (Eq. 5) and the dashed line shows the median, which is slightly different from the mean.

– DoOR – that includes the neural responses of most olfactory receptors (OR) of *Drosophila* to many odorants [47]. This database has collected its data from many other sources [18, 20, 48–60].

## 2 Material and methods

We want to study the relation between neural responses and molecular volumes, so we need the respective data. We take the neural data of DoOR database [47] and we calculate molecular volume (supplemental file 3) using a computational chemistry software – VEGA ZZ [61]. We used GNU R to analyse the data [62].

DoOR database can be summarized in an  $N \times M$  matrix. Its elements  $r_{nm}$ , are the response of neuron  $n$  to odorant  $m$ . This matrix is normalized between 0 and 1 so we have  $0 \leq r_{nm} \leq 1$ , where 1 is the strongest response. The only problem is that this matrix has some Not Available (NA) values, different neurons are excited by different set of odorants, so when summing over  $m$ ,  $\sum_m$ , we are calculating  $\sum_{m:r_{nm} \neq \text{NA}}$ , but for simplicity, we use the former notation.

The response  $r_{nm}$  depends on the molecular volume of the odorant,  $v_m$ , and other physio-chemical properties of the molecule  $m$ ; We assume that we can separate the response  $r_{nm}$  into two terms:

$$r_{nm} = f_n(v_m)\psi_{nm}. \quad (1)$$

The first term,  $f_n(v_m)$ , depends only on the molecular volume of odorants.

The second term,  $\psi_{nm}$  include every other influential properties of molecules, but the molecular volume. Both terms are characteristic of each receptor, and they might vary from neuron to neuron. In fact, the first term,  $f_n(v)$ , is the tuning curve of neuron  $n$  in respect to the molecular volumes, it can be approximated with a Gaussian function

$$f_n(v) = e^{-\frac{(v-v_n)^2}{2\sigma_n^2}}, \quad (2)$$

where,  $v_n$  is the preferred molecular volume of receptor  $n$  and  $\sigma_n$  represents its flexibility. In this work we want to estimate  $v_n$  and  $\sigma_n$ . To do so, first we calculate the response weighted average of molecular volumes,  $\frac{\sum_m v_m r_{nm}}{\sum_m r_{nm}}$  and then we use (1):

$$\frac{\sum_m v_m r_{nm}}{\sum_m r_{nm}} = \frac{\sum_m v_m f_n(v_m) \psi_{nm}}{\sum_m f_n(v_m) \psi_{nm}}. \quad (3)$$

Here we can approximate  $\sum$  with  $\int$ , which is common in statistical physics:

$$\sum_m \dots f_n(v_m) \psi_{nm} \approx \langle \psi_{nm} \rangle_m \int_0^\infty \dots f_n(v) g(v) dv. \quad (4)$$

In which,  $\langle \psi_{nm} \rangle_m$  denotes the average of  $\psi_{nm}$  over all  $m : r_{nm} \neq \text{NA}$ . It can be moved out of the integral for it is independent of  $v$ . In the above equation,  $g(v)$  is the density of states,  $g(v)dv$  indicates how many molecules have a molecular volume in the range of  $v$  and  $v + dv$ . This function can be approximated by a Gaussian function, Fig.2,

$$g(v) = e^{-\frac{(v-v_g)^2}{2\sigma_g^2}}, \quad (5)$$

ideally,  $g(v)$  should not depend on the neuron  $n$ , it is the property of ensemble of odorant molecules, not neurons. But here, we have many missing values ( $r_{nm} = \text{NA}$ ), so we have to calculate  $g(v)$  for each neuron separately; Therefore,  $v_{g_n}$  and  $\sigma_{g_n}$  are the average and standard deviation of molecular volume while  $r_{nm} \neq \text{NA}$ . Now we rewrite equation (3) using equation (4):

$$\frac{\sum_m v_m r_{nm}}{\sum_m r_{nm}} \approx \frac{\int v f_n(v) g_n(v) dv}{\int f_n(v) g_n(v) dv}. \quad (6)$$

We replace the product of  $f_n(v)$  and  $g_n(v)$  in the above equation with  $h_n(v) = f_n(v)g_n(v)$ , to make a simpler form

$$\frac{\sum_m v_m r_{nm}}{\sum_m r_{nm}} \approx \frac{\int_v v h_n(v) dv}{\int_v h_n(v) dv}. \quad (7)$$

The function  $h_n(v)$  is a Gaussian function because it is the product of two Gaussian functions,

$$h_n(v) = e^{-\frac{(v-\mu_{h_n})^2}{2\sigma_{h_n}^2}}, \quad (8)$$

so the right hand side of equation 7 is nothing but  $\mu_{h_n}$  and in a similar way, we can calculate  $\sigma_{h_n}$  from the neural data

$$\mu_{h_n} \approx \frac{\sum_m v_m r_{nm}}{\sum_m r_{nm}} \quad (9)$$

$$\sigma_{h_n}^2 \approx \frac{\sum_m v_m^2 r_{nm}}{\sum_m r_{nm}} - \mu_{h_n}^2 \quad (10)$$

We knew the mean  $v_{g_n}$  and standard deviation  $\sigma_{g_n}$  of  $g_n(v)$  from the molecular volumes of the ensembles of odorants. We just calculated the mean  $\mu_{h_n}$  and standard deviation  $\sigma_{h_n}$  of  $h_n(v)$  from the neural data. Now calculating the mean  $v_n$  and the standard deviation  $\sigma_n$  of  $f_n(v)$  is trivial, first we calculate  $\sigma_n$  from

$$\frac{1}{\sigma_n^2} = \frac{1}{\sigma_{h_n}^2} - \frac{1}{\sigma_{g_n}^2} \quad (11)$$

and then we calculate  $v_n$ :

$$v_n = \sigma_n^2 \left( \frac{\mu_{h_n}}{\sigma_{h_n}^2} - \frac{v_{g_n}}{\sigma_{g_n}^2} \right). \quad (12)$$

The calculated  $v_n$  and  $\sigma_n$  are in supplemental file 1. The resulting  $f_n(v)$  are plotted over the actual data, for 32 receptors (Fig. 3a), in which the relative error of  $v_n$  is lesser than 25% and  $\sigma_n < 80\text{\AA}^3$ , and for one receptor just magnify the details (Fig. 3b). Now we know the preferred volume  $v_n$  of each receptor and also its flexibility  $\sigma_n$ .

### 3 Results and discussions

There are two main assumption in this work: First we assumed that the response of an olfactory receptor can be factorized into two terms, according to (1). Second, we assumed that the volume dependence factor  $f_n(v_m)$  in (1) have a Gaussian form (Eq. 2). Considering the physics and chemistry behind the binding-process (Fig. 1), and the neural responses (Fig. 3), these assumptions are logical.

The function  $f_n(v)$  can be considered as the tuning curve of olfactory receptor  $n$  in response to molecular volume (Fig. 3). Each receptor has a preferred molecular volume  $v_n$  and shows some flexibility  $\sigma_n$ . We calculated the parameters of  $f_n(v)$  for 32 receptors (Fig. 3). The calculated values,  $v_n$  and  $\sigma_n$  are in Fig. 4a and 4b respectively. Figure 4a demonstrate that the molecular volume preference of receptors are different. Figure 4b illustrate that the flexibility of receptors are also different.

This diversity is important in perceiving the quality of smells. In a hypothetical experiment, assume that every characteristic of odorant molecules are the same but their molecular volume. If all olfactory receptors had the same preferred volume and flexibility, any change in the molecular volume would change only the intensity of smell not its quality. But olfactory receptors have different preferred volumes and flexibilities, so any change in the molecular volume of an odorant results in a different combinatorial encoding which affects the quality of perceived smell as well. That may describe the difference in the smell of methanol, ethanol, propanol and butanol. Methanol smells pungent, ethanol smells pleasant and winy, propanol smells like ethanol while butanol is similar to ethanol with little banana like aroma. The molecular volume affects the combinatorial encoding.

Here we showed that the responses of olfactory receptor neurons are related to the molecular volume of odorants, apart from that, it is not clear which other features of molecules are measured by olfactory receptors. It is a topic of ongoing researches, there are many works that try to connect the physio-chemical properties of molecules to the evoked neural response or perceived smells. But the non-linear volume dependence (Eq. 1 and Eq. 2) may mask important relations between molecules and neural responses.

By considering the effect of molecular volume on the response of olfactory receptor neurons, one might discover more subtle dependence between other molecular features and neural responses, by studying  $\psi_{nm}$ , which otherwise would be masked by this non-linear relation  $f_n(v)$ .

We also predict some *in-vivo* structural aspects of the binding-pocket of olfactory receptors: the preferred volume of each receptor results from the

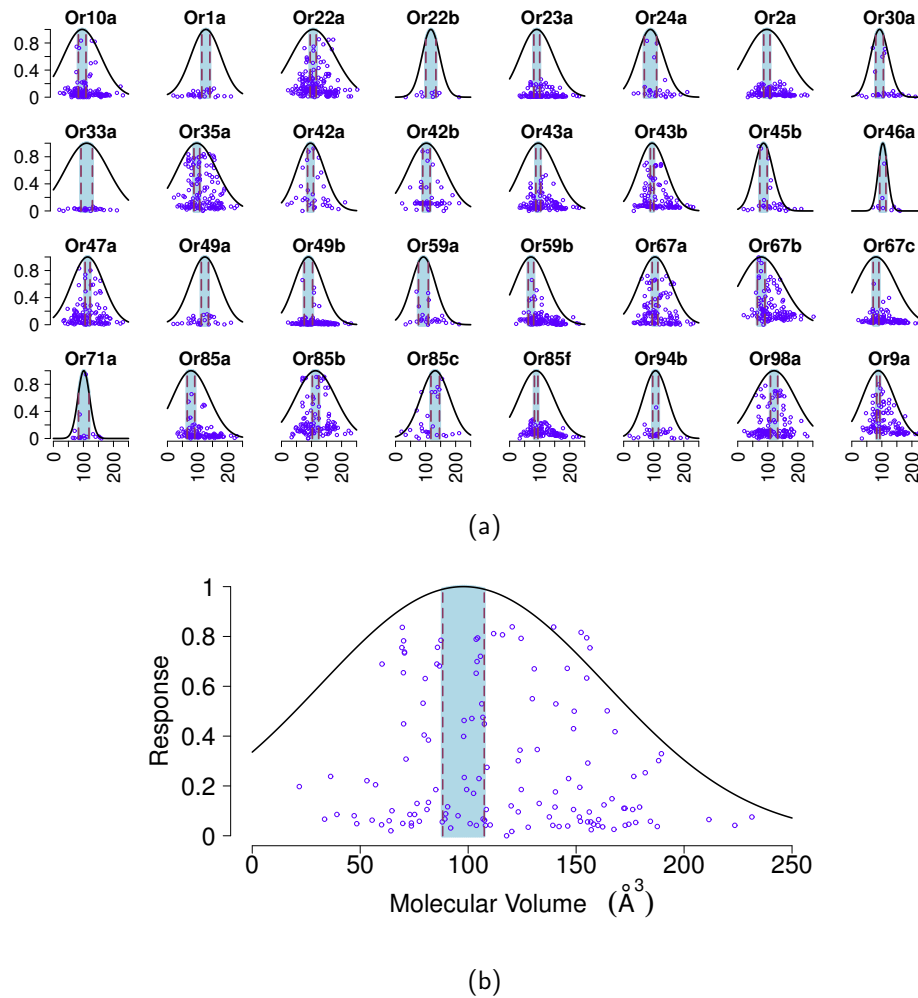

Fig. 3: Response of olfactory receptors versus molecular volume of odorants (Circles), the fitted functions  $f_n(v)$  from Eq. 1 (solid lines), and the error bars of the mean of  $f_n(v)$  (red vertical lines), for 32 selected receptors (Fig. 3a) and for one selected receptor Or35a (Fig. 3b) just to magnify details.



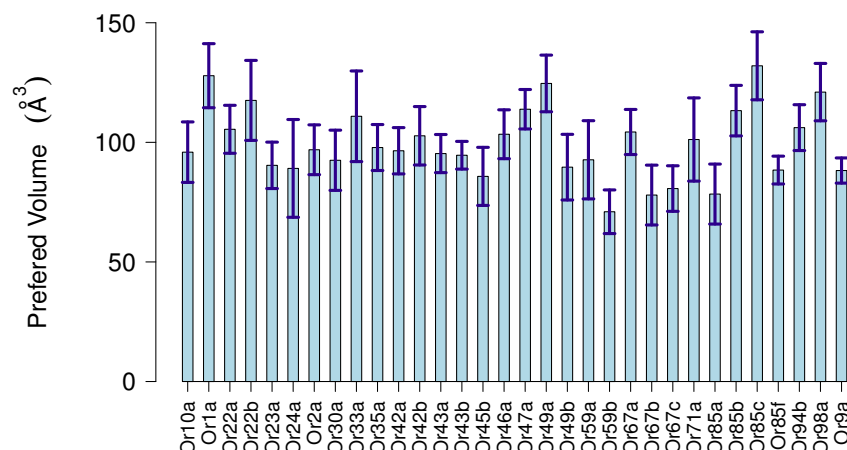

- (a) The preferred volumes of 32 receptors ( $v_n$ ), and their error bars. The error bars are calculated using Jack-Knife method. Some receptors prefer smaller molecules - like *Or59b*, *Or67b* and *Or85a*, but some other receptors prefer larger molecules - like *Or85c*, *Or1a* and *Or49a*.

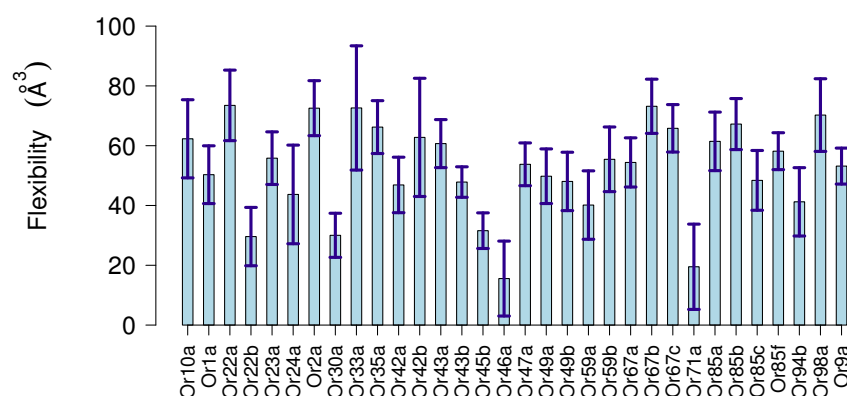

- (b) The flexibility of each receptor ( $\sigma_n$ ), the error bars are calculated using Jack-Knife method. Some receptors like *Or46a*, *Or71a* and *Or22b* are volume selective, but some other receptors like *Or22a*, *Or67b* and *Or33a* show flexibility and respond to broader range of molecular volumes.

Fig. 4

volume of the binding-pocket, the flexibility of a receptor results from the rigidity or flexibility of the binding-pocket; These data add some constraints over the 3d structure of olfactory receptors, which may help the prediction and calculation of 3d structure of these proteins.

The method of this work can be combined with mutagenesis as well. Some genes of an olfactory receptor are mutated, then its response to a selection of molecules are measured and finally the preferred volume and flexibility are calculated. In this way we can understand which amino acids of the olfactory receptor contribute to the volume and flexibility of the binding-pocket, as well as affecting the function of the receptors.

Our finding can also save time and expenses of experiments by suggesting important odorants for every receptors. To study  $\psi_{nm}$  of a receptor, it is better to have many data points and those data points are better to be around the preferred volume of the receptor. But this is not the case in current data, for many receptors, most data points are on the tails of  $f_n(v)$ , which is close to zero. We suggested the best selection of odorants for each of 32 studied receptors (see Venn diagram in Fig. 5 and supplemental file 2).

Although this work is on the data of *Drosophila*, we expect that the general principle and methodology of this work hold for vertebrates as well. But considering the similarities and dissimilarities between insects and vertebrate, this should be verified and more work are necessary.

## 4 Acknowledgments

We are especially grateful to B. N. Araabi, S. Aghvami and N. Doostani for the careful reading of the manuscript; and P. Carloni for the fruitful discussion.

## References

- [1] Mattias C Larsson et al. "Or83b encodes a broadly expressed odorant receptor essential for *Drosophila* olfaction." In: *Neuron* 43.5 (Oct. 2004), pp. 703–14. DOI: 10.1016/j.neuron.2004.08.019.
- [2] Cory M Root et al. "Propagation of olfactory information in *Drosophila*". In: *Proceedings of the National Academy of Sciences* 104.28 (2007), pp. 11826–11831.

# REFERENCES

11

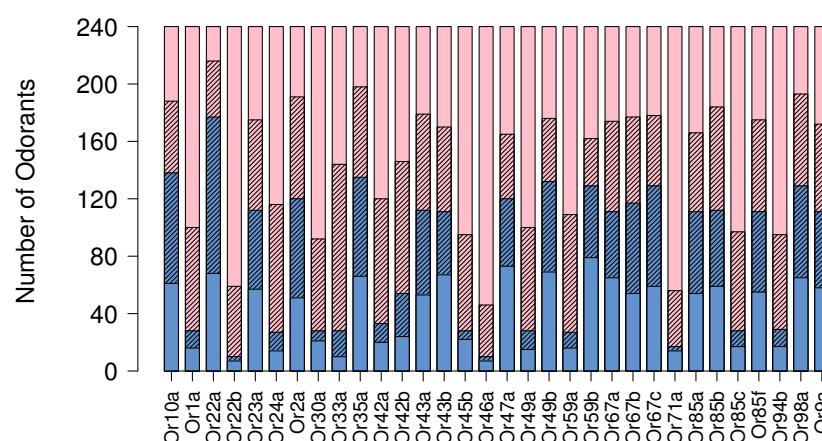

Fig. 5: Venn diagram of DoOR database and our suggested important odorants of each receptor. The database includes 240 odorant molecules, only a fraction of them are used to study an olfactory receptor (blue shades) and data for the rest of odorants are not available (pink shades). The hatched area are odorants with molecular volume close to the preferred volume of each receptor ( $v_n \pm \frac{\sigma}{2}$ ). We consider them as important samples to study the molecular basis of olfaction, We already know the neural response of hatched blue area, but the hatched pink odorants could be the target of further experiments.

## REFERENCES

12

- [3] Allison F Carey and John R Carlson. "Insect olfaction from model systems to disease control." In: *Proceedings of the National Academy of Sciences of the United States of America* 108.32 (Aug. 2011), pp. 12987–95. DOI: 10.1073/pnas.1103472108.
- [4] Leslie B Vosshall, Allan M Wong, and Richard Axel. "An Olfactory Sensory Map in the Fly Brain". In: *Cell* 102.2 (July 2000), pp. 147–159. DOI: 10.1016/S0092-8674(00)00021-0.
- [5] Africa Couto, Mattias Alenius, and Barry J Dickson. "Molecular, anatomical, and functional organization of the Drosophila olfactory system." In: *Current biology : CB* 15.17 (Sept. 2005), pp. 1535–47. DOI: 10.1016/j.cub.2005.07.034.
- [6] Elane Fishilevich and Leslie B Vosshall. "Genetic and Functional Subdivision of the *Drosophila* Antennal Lobe". In: *Current Biology* 15.17 (2005), pp. 1548–1553.
- [7] Qian Gao, Bingbing Yuan, and Andrew Chess. "Convergent projections of Drosophila olfactory neurons to specific glomeruli in the antennal lobe". In: *Nature neuroscience* 3.8 (2000), pp. 780–785.
- [8] Fan Wang et al. "Odorant receptors govern the formation of a precise topographic map". In: *Cell* 93.1 (1998), pp. 47–60.
- [9] Peter Mombaerts et al. "Visualizing an olfactory sensory map". In: *Cell* 87.4 (1996), pp. 675–686.
- [10] Robert Vassar et al. "Topographic organization of sensory projections to the olfactory bulb". In: *Cell* 79.6 (1994), pp. 981–991.
- [11] Bettina Malnic et al. "Combinatorial Receptor Codes for Odors". In: 96 (2000), pp. 713–723.
- [12] C Bushdid et al. "Humans can discriminate more than 1 trillion olfactory stimuli." In: *Science (New York, N.Y.)* 343.6177 (Mar. 2014), pp. 1370–2. DOI: 10.1126/science.1249168.
- [13] Luca Turin, Gower Street, and Gower Street. "ORIGINAL RESEARCH PAPER A Spectroscopic Mechanism for Primary Olfactory". In: ().
- [14] Andreas Keller and Leslie B Vosshall. "A psychophysical test of the vibration theory of olfaction." In: *Nature neuroscience* 7.4 (Apr. 2004), pp. 337–8. DOI: 10.1038/nn1215.
- [15] Ricardo C Araneda, Abhay D Kini, and Stuart Firestein. "The molecular receptive range of an odorant receptor". In: 3.12 (2000).

## REFERENCES

13

- [16] Jennifer Brookes et al. “Could Humans Recognize Odor by Phonon Assisted Tunneling?” In: *Physical Review Letters* 98.3 (Jan. 2007), p. 038101. DOI: 10.1103/PhysRevLett.98.038101.
- [17] Maria Isabel Franco et al. “Molecular vibration-sensing component in *Drosophila melanogaster* olfaction.” In: *Proceedings of the National Academy of Sciences of the United States of America* 108.9 (Mar. 2011), pp. 3797–802. DOI: 10.1073/pnas.1012293108.
- [18] Daniela Pelz et al. “The Molecular Receptive Range of an Olfactory Receptor in vivo ( *Drosophila melanogaster* Or22a )”. In: November (2006), pp. 1544–1563. DOI: 10.1002/neu.
- [19] Stephan Gabler et al. “Physicochemical vs. Vibrational Descriptors for Prediction of Odor Receptor Responses”. In: *Molecular Informatics* 32.9-10 (Oct. 2013), pp. 855–865. DOI: 10.1002/minf.201300037.
- [20] Michael Schmuker et al. “Predicting olfactory receptor neuron responses from odorant structure.” In: *Chemistry Central journal* 1 (Jan. 2007), p. 11. DOI: 10.1186/1752-153X-1-11.
- [21] Rafi Haddad et al. “Predicting the receptive range of olfactory receptors.” In: *PLoS computational biology* 4.2 (Feb. 2008), e18. DOI: 10.1371/journal.pcbi.0040018.
- [22] Kobi Snitz et al. “Predicting odor perceptual similarity from odor structure.” In: *PLoS computational biology* 9.9 (Jan. 2013), e1003184. DOI: 10.1371/journal.pcbi.1003184.
- [23] Adi Yablonka et al. “Odorant similarity in the mouse olfactory bulb”. In: 109.43 (2012), pp. 2916–2917. DOI: 10.1073/pnas.1211623109.
- [24] Simon Gane et al. “Molecular vibration-sensing component in human olfaction”. In: *PloS one* 8.1 (2013), e55780.
- [25] Linda Buck and Richard Axel. “A novel multigene family may encode odorant receptors: A molecular basis for odor recognition”. In: *Cell* 65.1 (Apr. 1991), pp. 175–187. DOI: 10.1016/0092-8674(91)90418-X.
- [26] Rachel I Wilson. “NIH Public Access”. In: (2014), pp. 217–241. DOI: 10.1146/annurev-neuro-062111-150533.Early.
- [27] U Benjamin Kaupp. “Olfactory signalling in vertebrates and insects: differences and commonalities.” In: *Nature reviews. Neuroscience* 11.3 (Mar. 2010), pp. 188–200. DOI: 10.1038/nrn2789.

# REFERENCES

14

- [28] Thomas Brody and Anibal Cravchik. “Drosophila melanogaster G Protein-coupled Receptors”. In: 150.2 (2000), pp. 83–88.
- [29] Catherine A. Hill et al. “G Protein-Coupled Receptors in *Anopheles gambiae*”. In: *Science* 298.5591 (2002), pp. 176–178. DOI: 10.1126/science.1076196. eprint: <http://www.sciencemag.org/content/298/5591/176.full.pdf>.
- [30] Koji Sato et al. “Insect olfactory receptors are heteromeric ligand-gated ion channels.” In: *Nature* 452.7190 (Apr. 2008), pp. 1002–6. DOI: 10.1038/nature06850.
- [31] Dieter Wicher et al. “Drosophila odorant receptors are both ligand-gated and cyclic-nucleotide-activated cation channels.” In: *Nature* 452.7190 (Apr. 2008), pp. 1007–11. DOI: 10.1038/nature06861.
- [32] Katherine I Nagel and Rachel I Wilson. “Biophysical mechanisms underlying olfactory receptor neuron dynamics.” In: *Nature neuroscience* 14.2 (Feb. 2011), pp. 208–16. DOI: 10.1038/nn.2725.
- [33] Yueguang Rong et al. “Correction for Rong et al., Spinster is required for autophagic lysosome reformation and mTOR reactivation following starvation”. In: *Proceedings of the National Academy of Sciences* 108.27 (June 2011), pp. 11297–11297. DOI: 10.1073/pnas.1108410108.
- [34] Richard Benton, Kirsten S Vannice, and Leslie B Vosshall. “An essential role for a CD36-related receptor in pheromone detection in *Drosophila*.” In: *Nature* 450.7167 (Nov. 2007), pp. 289–93. DOI: 10.1038/nature06328.
- [35] Renee Smart et al. “Drosophila odorant receptors are novel seven transmembrane domain proteins that can signal independently of heterotrimeric G proteins.” In: *Insect biochemistry and molecular biology* 38.8 (Aug. 2008), pp. 770–80. DOI: 10.1016/j.ibmb.2008.05.002.
- [36] Yang Zhang. “Progress and challenges in protein structure prediction.” In: *Current opinion in structural biology* 18.3 (June 2008), pp. 342–8. DOI: 10.1016/j.sbi.2008.02.004.
- [37] Paola Lupieri et al. “Computational molecular biology approaches to ligand-target interactions.” In: *HFSP journal* 3.4 (Aug. 2009), pp. 228–39. DOI: 10.2976/1.3092784.
- [38] Kamil Khafizov et al. “Ligand specificity of odorant receptors.” In: *Journal of molecular modeling* 13.3 (Mar. 2007), pp. 401–9. DOI: 10.1007/s00894-006-0160-9.

# REFERENCES

15

- [39] Orna Man and Yoav Gilad. “Prediction of the odorant binding site of olfactory receptor proteins by human - mouse comparisons”. In: (2004), pp. 240–254. DOI: 10.1110/ps.03296404.lical.
- [40] Peter C Lai, Michael S Singer, and Chiquito J Crasto. “Structural activation pathways from dynamic olfactory receptor-odorant interactions.” In: *Chemical senses* 30.9 (Nov. 2005), pp. 781–92. DOI: 10.1093/chemse/bji070.
- [41] Nagarajan Vaidehi et al. “Prediction of structure and function of G protein- coupled receptors”. In: (2002).
- [42] Wely B Floriano, Nagarajan Vaidehi, and William a Goddard. “Making sense of olfaction through predictions of the 3-D structure and function of olfactory receptors.” In: *Chemical senses* 29.4 (May 2004), pp. 269–90. DOI: 10.1093/chemse/bjh030.
- [43] Kristin Schmiedeberg et al. “Structural determinants of odorant recognition by the human olfactory receptors OR1A1 and OR1A2.” In: *Journal of structural biology* 159.3 (Sept. 2007), pp. 400–12. DOI: 10.1016/j.jsb.2007.04.013.
- [44] Sayako Katada et al. “Structural basis for a broad but selective ligand spectrum of a mouse olfactory receptor: mapping the odorant-binding site.” In: *The Journal of neuroscience : the official journal of the Society for Neuroscience* 25.7 (Feb. 2005), pp. 1806–15. DOI: 10.1523/JNEUROSCI.4723-04.2005.
- [45] Aya Kato, Sayako Katada, and Kazushige Touhara. “Amino acids involved in conformational dynamics and G protein coupling of an odorant receptor: targeting gain-of-function mutation.” In: *Journal of neurochemistry* 107.5 (Dec. 2008), pp. 1261–70. DOI: 10.1111/j.1471-4159.2008.05693.x.
- [46] Jean-Pierre Rospars. “Interactions of odorants with olfactory receptors and other preprocessing mechanisms: how complex and difficult to predict?” In: *Chemical senses* 38.4 (May 2013), pp. 283–7. DOI: 10.1093/chemse/bjt004.
- [47] C Giovanni Galizia et al. “Integrating heterogeneous odor response data into a common response model: A DoOR to the complete olfactome.” In: *Chemical senses* 35.7 (Sept. 2010), pp. 551–63. DOI: 10.1093/chemse/bjq042.

# REFERENCES

16

- [48] Marien De Bruyne, Peter J Clyne, and John R Carlson. “Odor Coding in a Model Olfactory Organ : The *Drosophila* Maxillary Palp”. In: 19.11 (1999), pp. 4520–4532.
- [49] Marien De Bruyne et al. “Odor Coding in the *Drosophila* Antenna”. In: 30 (2001), pp. 537–552.
- [50] Anna A Dobritsa et al. “Integrating the Molecular and Cellular Basis of Odor Coding in the *Drosophila* Antenna”. In: 37 (2003), pp. 827–841.
- [51] Aaron L Goldman et al. “Coexpression of two functional odor receptors in one neuron.” In: *Neuron* 45.5 (Mar. 2005), pp. 661–6. DOI: 10.1016/j.neuron.2005.01.025.
- [52] Elissa A Hallem et al. “The Molecular Basis of Odor Coding in the *Drosophila* Antenna”. In: 117 (2004), pp. 965–979.
- [53] Elissa a Hallem and John R Carlson. “Coding of odors by a receptor repertoire.” In: *Cell* 125.1 (Apr. 2006), pp. 143–60. DOI: 10.1016/j.cell.2006.01.050.
- [54] Scott a Kreher, Jae Young Kwon, and John R Carlson. “The molecular basis of odor coding in the *Drosophila* larva.” In: *Neuron* 46.3 (May 2005), pp. 445–56. DOI: 10.1016/j.neuron.2005.04.007.
- [55] Scott a Kreher et al. “Translation of sensory input into behavioral output via an olfactory system.” In: *Neuron* 59.1 (July 2008), pp. 110–24. DOI: 10.1016/j.neuron.2008.06.010.
- [56] Jae Young Kwon et al. “The molecular basis of CO<sub>2</sub> reception in *Drosophila*.” In: *Proceedings of the National Academy of Sciences of the United States of America* 104.9 (Mar. 2007), pp. 3574–8. DOI: 10.1073/pnas.0700079104.
- [57] M. C. Stensmyr. “Novel natural ligands for *Drosophila* olfactory receptor neurones”. In: *Journal of Experimental Biology* 206.4 (Feb. 2003), pp. 715–724. DOI: 10.1242/jeb.00143.
- [58] Stephanie Lynn Turner and Anandasankar Ray. “Modification of CO<sub>2</sub> avoidance behaviour in *Drosophila* by inhibitory odorants.” In: *Nature* 461.7261 (Sept. 2009), pp. 277–81. DOI: 10.1038/nature08295.
- [59] Wynand van der Goes van Naters and John R Carlson. “Receptors and neurons for fly odors in *Drosophila*.” In: *Current biology : CB* 17.7 (Apr. 2007), pp. 606–12. DOI: 10.1016/j.cub.2007.02.043.



## REFERENCES

17

- [60] C Andrea Yao, Rickard Ignell, and John R Carlson. “Chemosensory coding by neurons in the coeloconic sensilla of the *Drosophila* antenna.” In: *The Journal of neuroscience : the official journal of the Society for Neuroscience* 25.37 (Sept. 2005), pp. 8359–67. DOI: 10.1523/JNEUROSCI.2432-05.2005.
- [61] Alessandro Pedretti, Luigi Villa, and Giulio Vistoli. “VEGA - An open platform to develop chemo-bio-informatics applications, using plug-in architecture and script programming”. In: *Journal of Computer-Aided Molecular Design* 18.3 (Mar. 2004), pp. 167–173. DOI: 10.1023/B:JCAM.0000035186.90683.f2.
- [62] R Core Team. *R: A Language and Environment for Statistical Computing*. R Foundation for Statistical Computing. Vienna, Austria, 2014.
